# Supplementary material for: New insights into the phylogenetic relationships among wild onions (Allium, Amaryllidaceae), with special emphasis on the subgenera Anguinum and Rhizirideum, as revealed by plastomes
Source: Frontiers journal article supplement (doi:10.3389/fpls.2023.1124277), 2023-03-21

Supplementary Material

New insights into the phylogenetic relationships among wild onions (*Allium*, Amaryllidaceae), with special emphasis on the subgenera *Anguinum* and *Rhizirideum*, as revealed by plastomes

**JiYoung Yang1, Seon-Hee Kim2, Hee-Young Gil3, Hyeok-Jae Choi4*, Seung-Chul Kim5***

*** Correspondence:**Hyeok-Jae Choi and Seung-Chul Kim

hjchoi1975@changwon.ac.kr; sonchus96@skku.edu

# Supplementary Figure 2. 50% bootstrap consensus tree of MP analysis. Bootstrap supports are shown above branches.


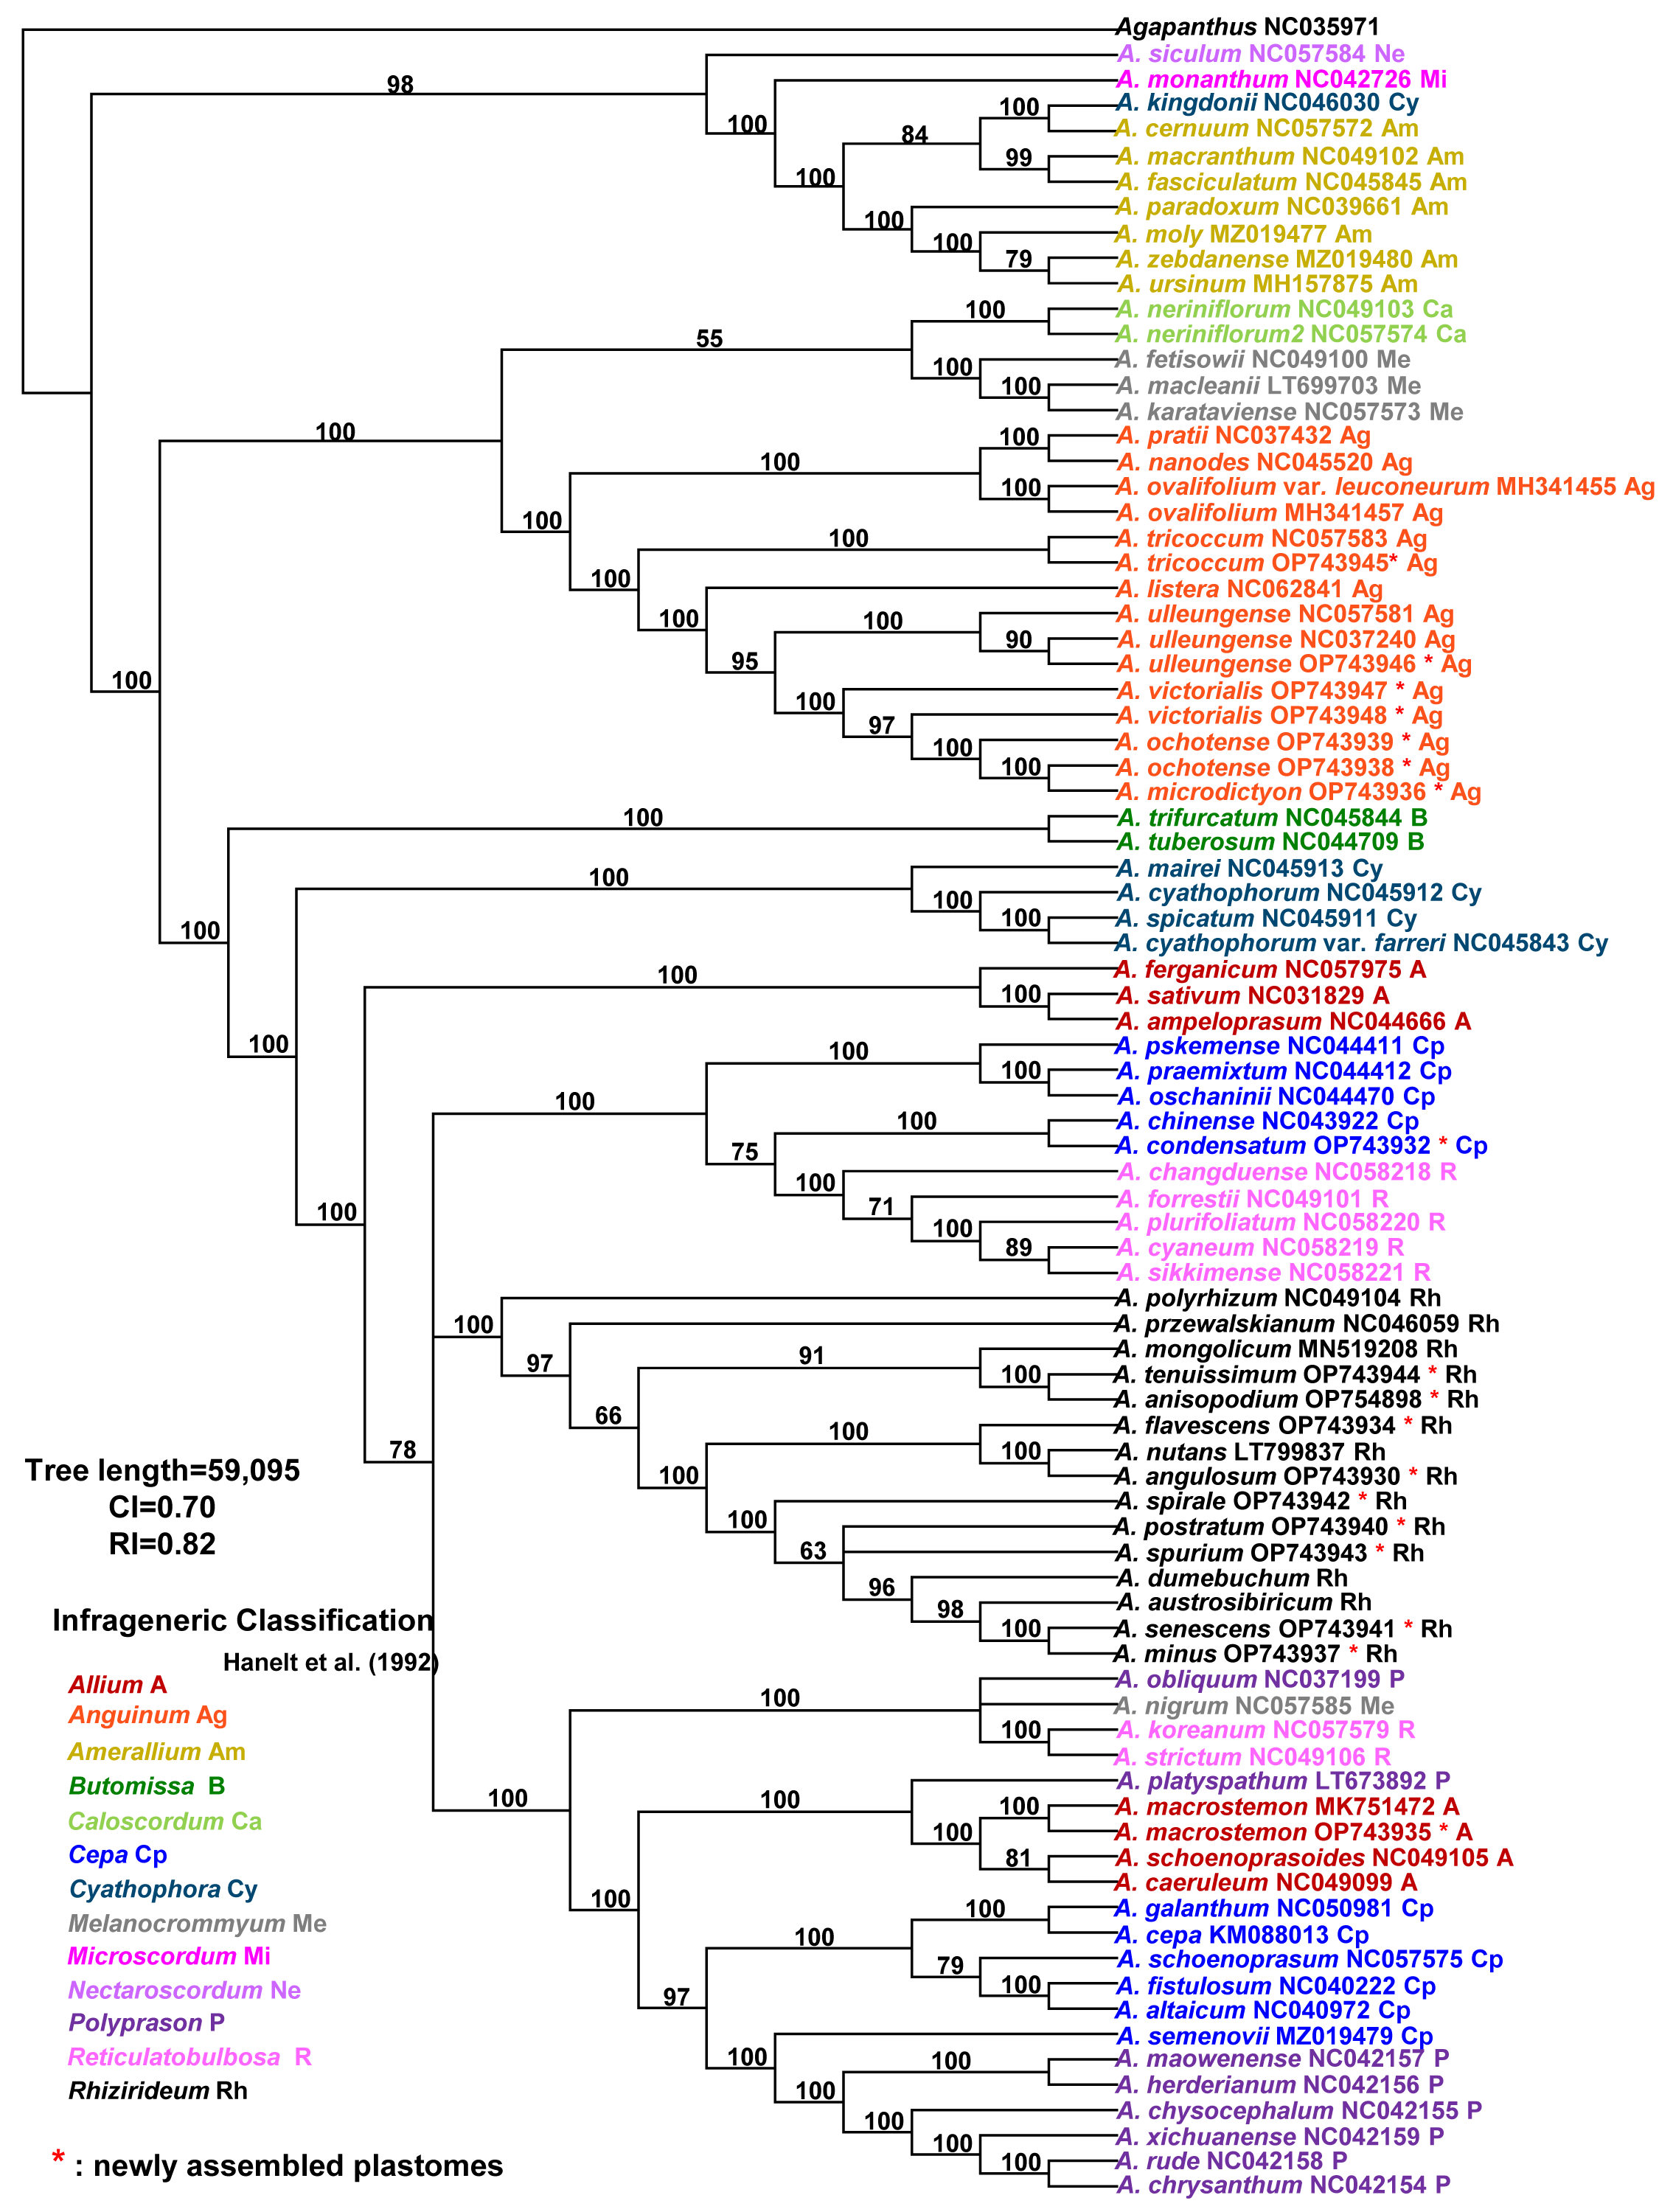

Supplement: Presentation_1.zip [file Presentation_1.zip]
